# Supplementary material for: Rapid diversification associated with a macroevolutionary pulse of developmental plasticity
Source: eLife journal article supplement (doi:10.7554/elife.05463), 2015-02-04
Supplement: supp [file elife_poa_e05463_Figure_2_source_data_2.docx]

**Figure 2-source data 2. GenBank accession numbers for gene sequences analyzed in this study.** Sequences shorter than 200 bp (with accession numbers beginning with “VS”) are available at www.pristionchus.org/download/suppSusoy2014.html.

| Nematode species | 18s rRNA | 28S rRNA | *rpl-2* | *rpl-6* | *rpl-9* | *rpl-10* | *rpl-14* | *rpl-23* | *rpl-35* | *rps-7* | *rps-14* | *rps-27* |  | *RNAp2* |
| --- | --- | --- | --- | --- | --- | --- | --- | --- | --- | --- | --- | --- | --- | --- |
| *Acrostichus halicti* | AB455817 | EU195983 | - | - | - | - | - | - | - | - | - | - | - | - |
| *Acrostichus* cf. *nudicapitatus* | JX163980 | KJ877318 | GQ422215 | Seq | GQ422185 | GQ422200 | GQ422323 | GQ422338 | GQ422353 | GQ422248 | GQ422278 | GQ422293 |  | - |
| *Acrostichus rhynchophori* | AB455210 | KJ877244 | KJ877294 | KJ877312 | KJ877327 | KJ877343 | KJ877359 | KJ877374 | KJ877391 | KJ877407 | KJ877424 | KJ877441 | VS0001 | - |
| *Allodiplogaster hylobii* | KJ877224 | KJ877266 | - | - | - | - | - | - | - | - | - | - | - | - |
| *Allodiplogaster* sp. 1 | JX163979 | JX163970 | EF634530 | GQ422165 | GQ422183 | EF634549 | EF634568 | EF634606 | EF634796 | GQ422246 | EF634891 | EF634986 | EF635005 | - |
| *Allodiplogaster sudhausi* | KJ877226 | KJ877267 | GQ422219 | GQ422171 | GQ422189 | GQ422204 | GQ422327 | GQ422342 | GQ422357 | GQ422252 | GQ422282 | GQ422297 |  |  |
| *Butlerius* sp. | KJ877204 | KJ877247 | - | - | - | - | - | - | - | - | - | - | - | - |
| *Diplogasteriana* sp. | KJ877202 | KJ877245 | - | - | - | - | - | - | - | - | - | - | - | - |
| *Diplogasteriana schneideri* | KJ877203 | KJ877246 | GQ422208 | GQ422157 | GQ422175 | GQ422193 | GQ422316 | GQ422331 | GQ422346 | GQ422238 | GQ422271 | GQ422286 |  | - |
| *Diplogasteroides magnus* | KJ877214 | KJ877270 | GQ422214 | GQ422166 | GQ422184 | GQ422199 | GQ422322 | GQ422337 | GQ422352 | GQ422247 | GQ422277 | GQ422292 |  | - |
| *Diplogasteroides* sp. 1 | KJ877215 | KJ877271 | GQ422209 | GQ422158 | GQ422176 | GQ422194 | GQ422317 | GQ422332 | GQ422347 | GQ422239 | GQ422272 | GQ422287 |  | - |
| *Diplogastrellus gracilis* | KJ877216 | KJ877249 | GQ422217 | GQ422169 | GQ422187 | GQ422202 | GQ422325 | GQ422340 | GQ422355 | GQ422250 | GQ422280 | GQ422295 |  | - |
| *Diplogastrellus* sp. | KJ877205 | KJ877248 | KJ877295 | KJ877313 | KJ877328 | KJ877344 | KJ877360 | KJ877375 | KJ877392 | KJ877408 | KJ877425 | KJ877442 | VS0002 | - |
| *Eudiplogasterium levidentum* | KJ877206 | KJ877258 | - | - | - | - | - | - | - | - | - | - | - | - |
| *Fictor* sp. 1 | KJ877233 | KJ877280 | KJ877288 | KJ877304 | KJ877321 | KJ877337 | KJ877353 | KJ877368 | KJ877384 | KJ877400 | KJ877418 | KJ877434 | VS0003 | - |
| *Fictor* sp. 2 | KJ877234 | KJ877281 | KJ877289 | KJ877306 | KJ877322 | KJ877338 | KJ877354 | KJ877369 | KJ877385 | KJ877401 | KJ877419 | KJ877435 | VS0004 | - |
| *Fictor stercorarius* | KJ877235 | KJ877282 | KJ877290 | KJ877308 | KJ877323 | KJ877339 | KJ877356 | KJ877370 | KJ877387 | KJ877403 | - | KJ877437 | VS0005 | - |
| *Fuchsnema halleri* | KJ877227 | KJ877253 | KJ877292 | KJ877310 | KJ877325 | KJ877341 | KJ877357 | KJ877372 | KJ877389 | KJ877405 | KJ877422 | KJ877439 | VS0006 | - |
| *Fuchsnema* sp. | KJ877228 | KJ877254 | KJ877299 | KJ877316 | KJ877332 | KJ877348 | KJ877364 | KJ877379 | KJ877395 | KJ877412 | KJ877429 | KJ877445 | VS0007 | - |
| *Koerneria luziae* | AB597232 | KJ877284 | KJ877291 | KJ877309 | KJ877324 | KJ877340 | - | KJ877371 | KJ877388 | KJ877404 | KJ877421 | KJ877438 | VS0008 | - |

**Figure 2-source data 2. GenBank accession numbers for gene sequences analyzed in this study.** Sequences shorter than 200 bp (with accession numbers beginning with “VS”) are available at www.pristionchus.org/download/suppSusoy2014.html.

| Nematode species | 18s rRNA | 28S rRNA | *rpl-2* | *rpl-6* | *rpl-9* | *rpl-10* | *rpl-14* | *rpl-23* | *rpl-35* | *rps-7* | *rps-14* | *rps-27* | *rps-28* | *RNAp2* |
| --- | --- | --- | --- | --- | --- | --- | --- | --- | --- | --- | --- | --- | --- | --- |
| *Koerneria* sp. | KJ877239 | KJ877283 | KJ877303 | KJ877320 | KJ877336 | KJ877352 | - | KJ877383 | KJ877399 | KJ877417 | KJ877433 | - | - | - |
| *Leptojacobus dorci* | KF924399 | KJ877277 | KJ877301 | KJ877319 | KJ877334 | KJ877350 | KJ877367 | KJ877381 | KJ877398 | KJ877415 | KJ877432 | KJ877448 | VS0009 | - |
| *Levipalatum texanum* | KJ877221 | KJ877257 | KJ395553 | KJ395554 | KJ395555 | KJ395556 | KJ395557 | KJ395558 | KJ395559 | KJ395560 | KJ395561 | KJ395562 |  | - |
| *Mehdinema alii* | KJ877213 | KJ877285 | - | - | - | - | - | - | - | - | - | - | - | - |
| *Micoletzkya buetschlii* | JX163973 | KJ877252 | GQ422210 | GQ422159 | GQ422177 | GQ422195 | GQ422318 | GQ422333 | GQ422348 | GQ422240 | GQ422273 | GQ422288 |  | - |
| *Micoletzkya inedia* | KJ531048 | KJ531104 | KJ531027 | - | KJ531020 | KJ531013 | - | KJ531001 | - | - | - | - | - | - |
| *Micoletzkya japonica* | JX163976 | JX163967 | JX163990 | KJ877307 | JX163984 | KJ531009 | KJ877355 | KJ530997 | KJ877386 | KJ877402 | KJ877420 | KJ877436 | VS0010 | - |
| *Micoletzkya* sp. | JX163975 | JX163966 | JX163989 | - | JX163983 | KJ531008 | KJ877366 | KJ530996 | KJ877397 | KJ877414 | KJ877431 | KJ877447 | VS0011 | - |
| *Mononchoides* sp. 1 | KJ877210 | KJ877262 | GQ422207 | GQ422156 | GQ422174 | GQ422192 | GQ422315 | GQ422330 | GQ422345 | GQ422237 | GQ422270 | GQ422285 |  | - |
| *Mononchoides* sp. 2 | KJ877209 | KJ877263 | - | - | - | - | - | - | - | - | - | - | - | - |
| *Mononchoides* sp. 3 | KJ877211 | KJ877264 | - | - | - | - | - | - | - | - | - | - | - | - |
| *Neodiplogaster crenatae* | GQ422304 | AB326309 | GQ422211 | GQ422160 | GQ422178 | GQ422196 | GQ422319 | GQ422334 | GQ422349 | GQ422241 | GQ422274 | GQ422289 |  | - |
| *Neodiplogaster* sp. | KJ877212 | KJ877265 | - | - | - | - | - | - | - | - | - | - | - | - |
| *Oigolaimella attenuata* | KJ877219 | KJ877276 | GQ422213 | GQ422162 | GQ422180 | GQ422198 | GQ422321 | GQ422336 | GQ422351 | GQ422243 | GQ422276 | GQ422291 |  | - |
| *Oigolaimella* sp. | KJ877218 | KJ877275 | KJ877300 | KJ877317 | KJ877333 | KJ877349 | KJ877365 | KJ877380 | KJ877396 | KJ877413 | KJ877430 | KJ877446 | VS0012 | - |
| *Parapristionchus giblindavisi* | JX163981 | JX163972 | JQ677914 | KJ877305 | JX163987 | JQ677915 | JQ677916 | JQ677917 | JQ677918 | VS0013 | JQ677919 | JQ677920 |  | - |
| *Parasitodiplogaster maxinema* | KJ877222 | AY840559 | - | - | - | - | - | - | - | - | - | - | - | - |
| *Paroigolaimella micrura* | KJ877207 | KJ877259 | KJ877296 | KJ877314 | KJ877329 | KJ877345 | KJ877361 | KJ877376 | - | KJ877409 | KJ877426 | KJ877443 | VS0014 | - |
| *Paroigolaimella stresemanni* | KJ877230 | KJ877261 | - | - | - | - | - | - | - | - | - | - | - | - |
| *Pristionchus elegans* | KJ877238 | KJ877274 | EF634529 | - | - | EF634548 | EF634567 | EF634605 | EF634795 | - | EF634890 | EF634985 | EF635004 | - |

**Figure 2-source data 2. GenBank accession numbers for gene sequences analyzed in this study.** Sequences shorter than 200 bp (with accession numbers beginning with “VS”) are available at www.pristionchus.org/download/suppSusoy2014.html.

| Nematode species | 18s rRNA | 28S rRNA | *rpl-2* | *rpl-6* | *rpl-9* | *rpl-10* | *rpl-14* | *rpl-23* | *rpl-35* | *rps-7* | *rps-14* | *rps-27* | *rps-28* | *RNAp2* |
| --- | --- | --- | --- | --- | --- | --- | --- | --- | --- | --- | --- | --- | --- | --- |
| *Pristionchus fissidentatus* | KJ877237 | KJ877273 | EF634524 | - | - | EF634543 | EF634562 | EF634600 | EF634790 | - | EF634885 | EF634980 | EF634999 | - |
| *Pristionchus maupasi* | DQ270019 | - | EF634513 | - | - | EF634532 | EF634551 | EF634589 | EF634779 | - | EF634874 | EF634969 | EF634988 | - |
| *Pristionchus pacificus* | AF083010 | EU195982 | EF634512 | GQ422163 | GQ422181 | EF634531 | EF634550 | EF634588 | EF634778 | GQ422244 | EF634873 | EF634968 | EF634987 | EU153426 |
| *Pristionchus uniformis* | KJ877236 | KJ877272 | EF634516 | GQ422164 | GQ422182 | EF634535 | EF634554 | EF634592 | EF634782 | GQ422245 | EF634877 | EF634972 | EF634991 | - |
| *Pseudodiplogasteroides* sp. | KJ877217 | KJ877250 | GQ422216 | GQ422168 | GQ422186 | GQ422201 | GQ422324 | GQ422339 | GQ422354 | GQ422249 | GQ422279 | GQ422294 |  | - |
| *Rhabditidoides* sp. | KJ877229 | KJ877251 | GQ422206 | GQ422155 | GQ422173 | GQ422191 | GQ422314 | GQ422329 | GQ422344 | GQ422236 | GQ422269 | GQ422284 |  | - |
| *Rhabditolaimus* sp. 1 | JQ005867 | KJ877256 | KJ877297 | KJ877315 | KJ877330 | KJ877346 | KJ877362 | KJ877377 | KJ877393 | KJ877410 | KJ877427 | KJ877444 | VS0015 | - |
| *Rhabditolaimus* sp. 2 | KJ877220 | KJ877255 | GQ422212 | GQ422161 | GQ422179 | GQ422197 | GQ422320 | GQ422335 | GQ422350 | GQ422242 | GQ422275 | GQ422290 |  | - |
| *Sachsia zurstrasseni* | KJ877208 | KJ877260 | KJ877293 | KJ877311 | KJ877326 | KJ877342 | KJ877358 | KJ877373 | KJ877390 | KJ877406 | KJ877423 | KJ877440 | VS0016 | - |
| *Sudhausia aristotokia* | KJ877231 | KJ877278 | KC831557 | KC831558 | KC831559 | KC831560 | KC831561 | KC831562 | KC831563 | KC831564 | KC831565 | KC831566 |  | - |
| *Sudhausia crassa* | KJ877232 | KJ877279 | KC831567 | KC831568 | KC831569 | KC831570 | KC831571 | KC831572 | KC831573 | KC831574 | KC831575 | KC831576 |  | - |
| *Teratodiplogaster* sp. 1 | KJ877225 | KJ877268 | KJ877298 | - | KJ877331 | KJ877347 | KJ877363 | KJ877378 | KJ877394 | KJ877411 | KJ877428 | - | - | - |
| *Teratodiplogaster* sp. 2 | KJ877223 | KJ877269 | - | - | - | - | - | - | - | - | - | - | - | - |
| *Tylopharynx foetida* | GQ422313 | - | GQ422220 | GQ422172 | GQ422190 | GQ422205 | GQ422328 | GQ422343 | GQ422358 | GQ422253 | GQ422283 | GQ422298 |  | - |
| Non-diplogastrid Rhabditina | | | | | | | | | | | | | | |
| *Brevibucca saprophaga* | EU196018 | DQ145675 | - | - | - | - | - | - | - | - | - | - | - | EU153442 |
| *Bunonema reticulatum* | EU196017 | EU195989 | - | - | - | - | - | - | - | - | - | - | - | EU161972 |
| *Bunonema* sp. | KJ877200 | KJ877287 | KJ877302 | - | KJ877335 | KJ877351 | - | KJ877382 | VS0017 | KJ877416 | - | VS0018 | VS0019 | - |
| *Caenorhabditis angaria* | AF083006 | AY604482 | - | - | - | - | - | - | - | - | - | - | - | AH013930.2 |
| *Caenorhabditis briggsae* | U13929 | AY604481 | - | - | - | - | - | - | - | - | - | - | - | XM002634714 |
| *Caenorhabditis elegans* | F31C3.7 | F31C3.9 | B0250.1 | R151.3.1 | R13A5.8 | F10B5.1.1 | C04F12.4.1 | B0336.10.1 | ZK652.4.1 | ZC434.2 | F37C12.9.1 | F56E10.4.1 | Y41D4B.5 | NM068122 |

**Figure 2-source data 2. GenBank accession numbers for gene sequences analyzed in this study.** Sequences shorter than 200 bp (with accession numbers beginning with “VS”) are available at www.pristionchus.org/download/suppSusoy2014.html.

| Nematode species | 18s rRNA | 28S rRNA | *rpl-2* | *rpl-6* | *rpl-9* | *rpl-10* | *rpl-14* | *rpl-23* | *rpl-35* | *rps-7* | *rps-14* | *rps-27* | *rps-28* | *RNAp2* |
| --- | --- | --- | --- | --- | --- | --- | --- | --- | --- | --- | --- | --- | --- | --- |
| *Choriorhabditis cristata* | EU196013 | EU195976 | - | - | - | - | - | - | - | - | - | - | - | EU153433 |
| *Cruznema tripartitum* | EU196012 | EU195974 | - | - | - | - | - | - | - | - | - | - | - | EU161966 |
| *Diploscapter* sp. | EU196003 | EU195959 | - | - | - | - | - | - | - | - | - | - | - | EU178799 |
| *Distolabrellus veechi* | AF082999 | EF990725 | - | - | - | - | - | - | - | - | - | - | - | EU153437 |
| *Heterorhabditis bacteriophora* | PRJNA13977 | LIBEST_020441 | | | | | | | | | | | | EX914671 |
| *Mesorhabditis acidophila* | FJ716584 | - | - | - | - | - | - | - | - | - | - | - | - | - |
| *Myolaimus byersi* | AB478627 | DQ145643, DQ145691 | - | - | - | - | - | - | - | - | - | - | - | - |
| *Odontopharynx longicaudata* | FJ040449 | DQ077775 | - | - | - | - | - | - | - | - | - | - | - | - |
| *Oscheius carolinensis* | FJ547240 | FJ547239 | - | - | - | - | - | - | - | - | - | - | - | - |
| *Oscheius guentheri* | EU196022 | EU195996 | - | - | - | - | - | - | - | - | - | - | - | - |
| *Oscheius myriophila* | U81588 | AY602176 | - | - | - | - | - | - | - | - | - | - | - | AH013932 |
| *Oscheius tipulae* | EU196009 | EU195969 | - | - | - | - | - | - | - | - | - | - | - | EU153430 |
| *Panagrellus redivivus* | AF083007 | EU195986 | PRED_933.g23405.t1 | PRED_909.g21363.t1 | PRED_394.g3470.t1 | PRED_786.g13592.t1 | PRED_783.g13307.t1 | PRED_568.g7075.t1 | PRED_827.g16225.t1 | PRED_628.g8836.t1 | PRED_367.g3255.t1 | PRED_902.g20902.t1 | PRED_895.g20027.t1 | EU153440 |
| *Parasitorhabditis obtusa* | EU003189 | EF990724 | - | - | - | - | - | - | - | - | - | - | - | - |
| *Pelodera cylindrica* | EU196021 | EU195994 | - | - | - | - | - | - | - | - | - | - | - | - |
| *Pelodera strongyloides* | U13932 | EU195977 | - | - | - | - | - | - | - | - | - | - | - | EU153420 |
| *Pelodera teres* | AF083002 | EU195979 | - | - | - | - | - | - | - | - | - | - | - | EU153422 |
| *Pellioditis* sp. | KJ877241 | KJ877242 | - | - | - | - | - | - | - | - | - | - | - | - |
| *Poikilolaimus floridensis* | AB370214 | AB370213 | - | - | - | - | - | - | - | - | - | - | - | - |
| *Poikilolaimus oxycercus* | AF083023 | - | - | - | - | - | - | - | - | - | - | - | - | EU161976 |

**Figure 2-source data 2. GenBank accession numbers for gene sequences analyzed in this study.** Sequences shorter than 200 bp (with accession numbers beginning with “VS”) are available at www.pristionchus.org/download/suppSusoy2014.html.

| Nematode species | 18s rRNA | 28S rRNA | *rpl-2* | *rpl-6* | *rpl-9* | *rpl-10* | *rpl-14* | *rpl-23* | *rpl-35* | *rps-7* | *rps-14* | *rps-27* | *rps-28* | *RNAp2* |
| --- | --- | --- | --- | --- | --- | --- | --- | --- | --- | --- | --- | --- | --- | --- |
| *Protorhabditis* sp. | KJ877201 | KJ877286 | - | - | - | - | - | - | - | - | - | - | - | - |
| *Rhabditis brassicae* | KJ877240 | KJ877243 | - | - | - | - | - | - | - | - | - | - | - | EU161961 |
| *Rhabditis colombiana* | AY751546 | - | - | - | - | - | - | - | - | - | - | - | - | - |
| *Rhabditis rainai* | AF083008 | EU195966 | - | - | - | - | - | - | - | - | - | - | - | EU153429 |
| *Rhabditoides inermis* | AF082996 | EU195981 | GQ422218 | GQ422170 | GQ422188 | GQ422203 | GQ422326 | GQ422341 | GQ422356 | GQ422251 | GQ422281 | GQ422296 |  | EU153425 |
| *Strongyloides ratti* | RATTI_contig_74139 | RATTI_contig_74139 | Sr321_010963400.t1 | Sr321_010180300.t1 | Sr321_020506200.t1 | Sr321_010252500.t1 | Sr321_020425600.t1 | Sr321_020774900.t1 | Sr321_021213100.t1 | Sr321_010215600.t1 | Sr321_020374200.t1 | Sr321_020762900.t1 | - | CACX01002125 |
| *Teratorhabditis mariannae* | EF990716 | EF990721 | - | - | - | - | - | - | - | - | - | - | - | - |
| *Teratorhabditis palmarum* | U13937 | EF990717 | - | - | - | - | - | - | - | - | - | - | - | EU153436 |
| *Teratorhabditis synpapillata* | AB269816 | EF990719 | - | - | - | - | - | - | - | - | - | - | - | - |
| *Zeldia punctata* | U61760 | EU195988 | AW773453 | - | AW783724 | AW783730 | - | AW783800 | - | AW773466 | - | AW783711 | AW783805 | U61763 |
