# Supplementary material for: Rapid diversification associated with a macroevolutionary pulse of developmental plasticity
Source: eLife journal article supplement (doi:10.7554/elife.05463), 2015-02-04
Supplement: supp [file elife_poa_e05463_Figure_3_source_data_1.docx]

**Figure 3-source data** **1. Results of principal component analysis ofstomatal form in Rhabditina, including both morphs of dimorphic taxa.** Loadings of Procrustes coordinates and log centroid size of stomatal form onto the first four principal component (PC) axes are shown, as are the proportion of variance explained by those PC axes.

|  | PC1 | PC2 | PC3 | PC4 |
| --- | --- | --- | --- | --- |
| Procrustes coordinate 1 | -0.052 | 0.101 | -0.074 | -0.216 |
| Procrustes coordinate 2 | -0.052 | 0.192 | 0.150 | -0.011 |
| Procrustes coordinate 3 | -0.086 | 0.223 | -0.020 | -0.077 |
| Procrustes coordinate 4 | -0.143 | 0.246 | 0.011 | -0.119 |
| Procrustes coordinate 5 | -0.054 | 0.168 | -0.058 | -0.113 |
| Procrustes coordinate 6 | -0.107 | 0.180 | -0.024 | -0.192 |
| Procrustes coordinate 7 | -0.103 | 0.225 | 0.067 | -0.102 |
| Procrustes coordinate 8 | 0.009 | 0.024 | -0.561 | 0.305 |
| Procrustes coordinate 9 | -0.049 | 0.094 | -0.061 | -0.132 |
| Procrustes coordinate 10 | 0.054 | -0.160 | 0.363 | 0.162 |
| Procrustes coordinate 11 | 0.008 | -0.015 | -0.064 | -0.036 |
| Procrustes coordinate 12 | 0.061 | -0.161 | 0.453 | 0.226 |
| Procrustes coordinate 13 | -0.059 | 0.123 | 0.043 | 0.249 |
| Procrustes coordinate 14 | 0.224 | -0.469 | -0.165 | -0.654 |
| Procrustes coordinate 15 | 0.113 | -0.285 | 0.115 | 0.016 |
| Procrustes coordinate 16 | 0.098 | -0.099 | -0.471 | 0.337 |
| Procrustes coordinate 17 | 0.084 | -0.210 | 0.049 | 0.154 |
| Procrustes coordinate 18 | -0.061 | 0.060 | 0.018 | -0.102 |
| Procrustes coordinate 19 | 0.134 | -0.305 | -0.003 | 0.079 |
| Procrustes coordinate 20 | -0.069 | 0.073 | 0.045 | -0.035 |
| Procrustes coordinate 21 | 0.064 | -0.119 | 0.005 | 0.176 |
| Procrustes coordinate 22 | -0.014 | 0.115 | 0.182 | 0.082 |
| Log centroid size | 0.905 | 0.414 | 0.039 | -0.022 |
| Proportion of variance | 0.73 | 0.16 | 0.05 | 0.03 |
| Cumulative proportion | 0.73 | 0.88 | 0.93 | 0.96 |
