# Supplementary material for: Rapid diversification associated with a macroevolutionary pulse of developmental plasticity
Source: eLife journal article supplement (doi:10.7554/elife.05463), 2015-02-04
Supplement: supp [file elife_poa_e05463_Figure_3_source_data_2.docx]

**Figure 3-source data 2. Results of principal component analysis of stomatal shape in Rhabditina, including both morphs of dimorphic taxa.** Loadings of Procrustes coordinates of stomatal shape onto the first four principal component (PC) axes are shown, as are the proportion of variance explained by those PC axes.

|  | PC1 | PC2 | PC3 | PC4 | PC5 |
| --- | --- | --- | --- | --- | --- |
| Procrustes coordinate 1 | -0.12 | 0.07 | -0.22 | -0.11 | -0.40 |
| Procrustes coordinate 2 | -0.17 | -0.12 | 0.02 | 0.44 | -0.18 |
| Procrustes coordinate 3 | -0.22 | 0.04 | -0.06 | 0.26 | 0.04 |
| Procrustes coordinate 4 | -0.31 | -0.01 | -0.12 | -0.20 | 0.39 |
| Procrustes coordinate 5 | -0.16 | 0.07 | -0.10 | 0.16 | -0.23 |
| Procrustes coordinate 6 | -0.23 | 0.01 | -0.20 | -0.34 | -0.18 |
| Procrustes coordinate 7 | -0.25 | -0.05 | -0.09 | 0.16 | 0.13 |
| Procrustes coordinate 8 | 0.00 | 0.57 | 0.28 | -0.04 | 0.16 |
| Procrustes coordinate 9 | -0.11 | 0.06 | -0.13 | 0.00 | 0.02 |
| Procrustes coordinate 10 | 0.15 | -0.37 | 0.17 | -0.06 | -0.14 |
| Procrustes coordinate 11 | 0.02 | 0.06 | -0.04 | -0.03 | -0.02 |
| Procrustes coordinate 12 | 0.16 | -0.45 | 0.23 | -0.03 | 0.01 |
| Procrustes coordinate 13 | -0.14 | -0.04 | 0.25 | -0.15 | 0.30 |
| Procrustes coordinate 14 | 0.52 | 0.13 | -0.66 | 0.20 | 0.26 |
| Procrustes coordinate 15 | 0.29 | -0.13 | 0.01 | -0.18 | -0.11 |
| Procrustes coordinate 16 | 0.18 | 0.48 | 0.33 | 0.06 | -0.27 |
| Procrustes coordinate 17 | 0.22 | -0.06 | 0.15 | -0.04 | 0.29 |
| Procrustes coordinate 18 | -0.11 | -0.03 | -0.11 | -0.30 | -0.17 |
| Procrustes coordinate 19 | 0.33 | -0.01 | 0.07 | -0.16 | -0.26 |
| Procrustes coordinate 20 | -0.12 | -0.06 | -0.05 | -0.22 | 0.16 |
| Procrustes coordinate 21 | 0.14 | 0.00 | 0.18 | 0.08 | 0.25 |
| Procrustes coordinate 22 | -0.08 | -0.15 | 0.11 | 0.49 | -0.03 |
| Proportion of variance | 0.68 | 0.12 | 0.09 | 0.05 | 0.01 |
| Cumulative proportion | 0.68 | 0.81 | 0.90 | 0.94 | 0.96 |
