# Supplementary material for: Rapid diversification associated with a macroevolutionary pulse of developmental plasticity
Source: eLife journal article supplement (doi:10.7554/elife.05463), 2015-02-04
Supplement: supp [file elife_poa_e05463_Figure_3_source_data_4.docx]

**Figure 3-source data 4. Results of phylogenetic principal component analysis of stomatal shape in Rhabditina, with dimorphic taxa represented by the stenostomatous (St) morph.** Loadings of Procrustes coordinates of stomatal shape onto the first four principal component (PC) axes are shown, as are the proportion of variance explained by those PC axes.

|  | PC1 | PC2 | PC3 | PC4 | PC5 |
| --- | --- | --- | --- | --- | --- |
| Procrustes coordinate 1 | -0.81 | 0.00 | 0.07 | 0.34 | 0.33 |
| Procrustes coordinate 2 | -0.27 | -0.12 | -0.80 | 0.47 | 0.08 |
| Procrustes coordinate 3 | -0.87 | 0.18 | -0.30 | 0.14 | -0.19 |
| Procrustes coordinate 4 | -0.88 | -0.16 | 0.26 | -0.12 | -0.24 |
| Procrustes coordinate 5 | -0.89 | 0.17 | -0.15 | 0.22 | 0.13 |
| Procrustes coordinate 6 | -0.82 | -0.12 | 0.40 | -0.19 | 0.19 |
| Procrustes coordinate 7 | -0.92 | -0.05 | -0.13 | -0.02 | -0.20 |
| Procrustes coordinate 8 | -0.03 | 0.89 | -0.12 | -0.25 | 0.12 |
| Procrustes coordinate 9 | -0.78 | 0.08 | 0.11 | 0.19 | 0.07 |
| Procrustes coordinate 10 | 0.72 | -0.63 | -0.11 | -0.03 | 0.11 |
| Procrustes coordinate 11 | 0.11 | 0.22 | 0.32 | -0.06 | 0.10 |
| Procrustes coordinate 12 | 0.65 | -0.70 | -0.18 | -0.13 | -0.02 |
| Procrustes coordinate 13 | -0.16 | -0.36 | -0.23 | -0.34 | 0.03 |
| Procrustes coordinate 14 | 0.65 | 0.35 | 0.41 | 0.51 | -0.14 |
| Procrustes coordinate 15 | 0.93 | -0.14 | 0.09 | 0.08 | 0.10 |
| Procrustes coordinate 16 | 0.41 | 0.77 | -0.22 | -0.32 | 0.05 |
| Procrustes coordinate 17 | 0.90 | -0.03 | -0.02 | -0.21 | -0.21 |
| Procrustes coordinate 18 | -0.61 | -0.27 | 0.51 | -0.15 | 0.31 |
| Procrustes coordinate 19 | 0.95 | -0.04 | 0.17 | -0.04 | 0.20 |
| Procrustes coordinate 20 | -0.63 | -0.37 | 0.32 | -0.14 | -0.34 |
| Procrustes coordinate 21 | 0.68 | 0.06 | 0.10 | -0.40 | -0.36 |
| Procrustes coordinate 22 | 0.13 | -0.11 | -0.87 | 0.40 | -0.10 |
| Proportion of variance | 0.52 | 0.17 | 0.10 | 0.07 | 0.03 |
| Cumulative proportion | 0.52 | 0.69 | 0.79 | 0.86 | 0.90 |
