# Supplementary material for: Rapid diversification associated with a macroevolutionary pulse of developmental plasticity
Source: eLife journal article supplement (doi:10.7554/elife.05463), 2015-02-04
Supplement: supp [file elife_poa_e05463_Figure_3_source_data_5.docx]

**Figure 3-source data 5. Estimates of morphological disparity of the stoma in Rhabditina.** Groups compared were non-diplogastrid Rhabditina, monomorphic Diplogastridae, and dimorphic Diplogastridae. Disparity was measured as the principal component (PC) analysis volume and the sum of univariate variances. PC scores along the first two and three PC axes of Procrustes form and shape space, respectively, were used and are presented in the form mean±standard deviation (95% confidence interval). Eu, eurystomatous; St, stenostomatous.

| Procrustes form-space | | | | |
| --- | --- | --- | --- | --- |
| Group | n | Rarefaction | Sum of variances | PCA volume |
| Non-diplogastrid Rhabditina | 33 | 23 | 0.09±0.025  (0.046-0.144) | 0.066±0.021  (0.032-0.112) |
| Monomorphic and St Diplogastridae | 54 | 23 | 0.241±0.06  (0.135-0.367) | 0.163±0.053  (0.078-0.279) |
| Monomorphic, Eu, and St Diplogastridae | 77 | 23 | 0.218±0.041  (0.145-0.305) | 0.13±0.032  (0.081-0.204) |
| St Diplogastridae | 23 | 23 | 0.097±0.031  (0.043-0.166) | 0.061±0.021  (0.027-0.109) |
| Eu Diplogastridae | 23 | 23 | 0.068±0.027  (0.026-0.129) | 0.044±0.02  (0.015-0.092) |
| Monomorphic Diplogastridae | 31 | 23 | **0.301±0.083**  **(0.151-0.475)** | **0.219±0.074**  **(0.099-0.383)** |
| Procrustes shape-space | | | | |
| Group | n | Rarefaction | Sum of variances | PCA volume |
| Non-diplogastrid Rhabditina | 33 | 23 | 0.0385±0.0045  (0.0297-0.0475) | 0.0291±0.003  (0.023-0.0349) |
| Monomorphic and St Diplogastridae | 54 | 23 | 0.0749±0.0082  (0.0584-0.0905) | 0.0536±0.0076  (0.0386-0.0683) |
| Monomorphic, Eu, and St Diplogastridae | 77 | 23 | 0.0705±0.0084  (0.0532-0.0865) | 0.0513±0.0077  (0.0361-0.0661) |
| St Diplogastridae | 23 | 23 | 0.0342±0.0132  (0.0117-0.0618) | 0.0227±0.0107  (0.0063-0.0463) |
| Eu Diplogastridae | 23 | 23 | 0.0205±0.0094  (0.0064-0.0411) | 0.014±0.008  (0.0044-0.0329) |
| Monomorphic Diplogastridae | 31 | 23 | **0.0781±0.0105**  **(0.0575-0.0987)** | **0.0566±0.0093**  **(0.0386-0.0750)** |
