# Supplementary material for: Rapid diversification associated with a macroevolutionary pulse of developmental plasticity
Source: eLife journal article supplement (doi:10.7554/elife.05463), 2015-02-04
Supplement: supp [file elife_poa_e05463_Figure_3_source_data_6.docx]

**Figure 3-source data 6. Rates of stomatal evolution along the first principal component (PC) axis of Procrustes form- and shape-space.** Rates were compared for non-diplogastrid Rhabditina (Rh), dimorphic Diplogastridae (Dm), and monomorphic Diplogastridae (Mn). Numbers indicate separate rate parameters for the designated groups. Model-averaged rates with standard deviation are shown.

| Procrustes form-space | | | | | | |
| --- | --- | --- | --- | --- | --- | --- |
| Model (Rh-Dm-Mn) | Rate 1 | Rate 2 | Rate 3 | -lnL | *k* | AICc |
| 1-1-2 | 0.378±0.127 | 1.292±0.201 | na | -38.682 | 3 | **83.37** |
| 1-2-3 | 0.340±0.124 | 0.438±0.136 | 1.273±0.202 | -38.409 | 4 | 84.83 |
| 1-2-2 | 0.347±0.120 | 0.831±0.165 | na | -41.330 | 3 | 88.67 |
| 1-1-1 | 0.644±0.145 | na | na | -45.001 | 2 | 94.01 |
| 1-2-1 | 0.693±0.156 | 0.548±0.134 | na | -44.073 | 3 | 94.15 |
| Procrustes shape-space | | | | | | |
| Model (Rh-Dm-Mn) | Rate 1 | Rate 2 | Rate 3 | -lnL | *k* | AICc |
| 1-2-3 | 0.044±0.012 | 0.094±0.029 | 0.244±0.06 | 38.107 | 4 | **-68.20** |
| 1-1-2 | 0.064±0.016 | 0.247±0.060 | na | 36.514 | 3 | -67.02 |
| 1-2-2 | 0.042±0.011 | 0.169±0.039 | na | 35.585 | 3 | -65.16 |
| 1-1-1 | 0.118±0.027 | na | na | 28.711 | 2 | -53.41 |
| 1-2-1 | 0.125±0.031 | 0.104±0.026 | na | 29.468 | 3 | -52.93 |
