# Supplementary material for: Rapid diversification associated with a macroevolutionary pulse of developmental plasticity
Source: eLife journal article supplement (doi:10.7554/elife.05463), 2015-02-04
Supplement: supp [file elife_poa_e05463_Figure_3_source_data_7.docx]

**Figure 3-source data 7. Statistical comparison of non-nested models of stomatal evolution along the first principal component (PC) axis of Procrustes form- and shape-space using a chi-square distribution.** Numbers indicate separate rate parameters for the designated groups. Rh, non-diplogastrid Rhabditina (Rh); Dm, dimorphic Diplogastridae; Mn, monomorphic Diplogastridae.

|  | Procrustes form-space |  |
| --- | --- | --- |
| Null model  (Rh-Dm-Mn) | Alternative model  (Rh-Dm-Mn) | Chi-square p-values |
| 1-1-1 | 1-2-1 | 0.2435 |
| 1-1-1 | 1-2-2 | **0.0108** |
| 1-1-1 | 1-1-2 | **0.0011** |
| 1-1-1 | 1-2-3 | **0.0038** |
| 1-2-1 | 1-2-3 | **0.0058** |
| 1-2-2 | 1-2-3 | 0.0923 |
| 1-1-2 | 1-2-3 | 0.7931 |
|  | Procrustes shape-space |  |
| Null model  (Rh-Dm-Mn) | Alternative model  (Rh-Dm-Mn) | Chi-square p-values |
| 1-1-1 | 1-2-1 | 0.3236 |
| 1-1-1 | 1-2-2 | **0.0007** |
| 1-1-1 | 1-1-2 | **0.0002** |
| 1-1-1 | 1-2-3 | **0.0002** |
| 1-2-1 | 1-2-3 | **0.0005** |
| 1-2-2 | 1-2-3 | 0.1314 |
| 1-1-2 | 1-2-3 | 0.2968 |
