# Supplementary material for: Rapid diversification associated with a macroevolutionary pulse of developmental plasticity
Source: eLife journal article supplement (doi:10.7554/elife.05463), 2015-02-04
Supplement: supp [file elife_poa_e05463_Figure_3_source_data_8.docx]

**Figure 3-source data 8. Highest posterior densities (HPD) of rates, and associated p-values obtained from two-tailed randomization tests, of stomatal form and shape evolution.** Tests were performed for the branches assigned to non-diplogastrid Rhabditina, dimorphic Diplogastridae, and monomorphic Diplogastridae. CI, confidence interval.

| Procrustes form-space | | | | |
| --- | --- | --- | --- | --- |
| Lineage | HPD mean  (95% CI) | Non-diplogastrid Rhabditina | Dimorphic Diplogastridae | Monomorphic Diplogastridae |
| Non-diplogastrid Rhabditina | 0.727  (0.117-1.482) | 0.998 |  |  |
| Dimorphic Diplogastridae | 1.402  (0.251-2.807) | 0.391 | 0.987 |  |
| Monomorphic Diplogastridae | 3.079  (0.606-7.335) | **0.041** | 0.336 | 0.997 |
| Procrustes shape-space | | | | |
| Lineage | HPD mean  (95% CI) | Non-diplogastrid Rhabditina | Dimorphic Diplogastridae | Monomorphic Diplogastridae |
| Non-diplogastrid Rhabditina | -1.074  (-1.523--0.560) | 0.998 |  |  |
| Dimorphic Diplogastridae | -0.358  (-0.577--0.145) | **0.017** | 0.998 |  |
| Monomorphic Diplogastridae | -0.282  (-0.525--0.053) | **0.012** | 0.652 | 0.998 |
