# Supplementary figures and images for: Rapid diversification associated with a macroevolutionary pulse of developmental plasticity
Source: eLife journal article supplement (doi:10.7554/elife.05463), 2015-02-04

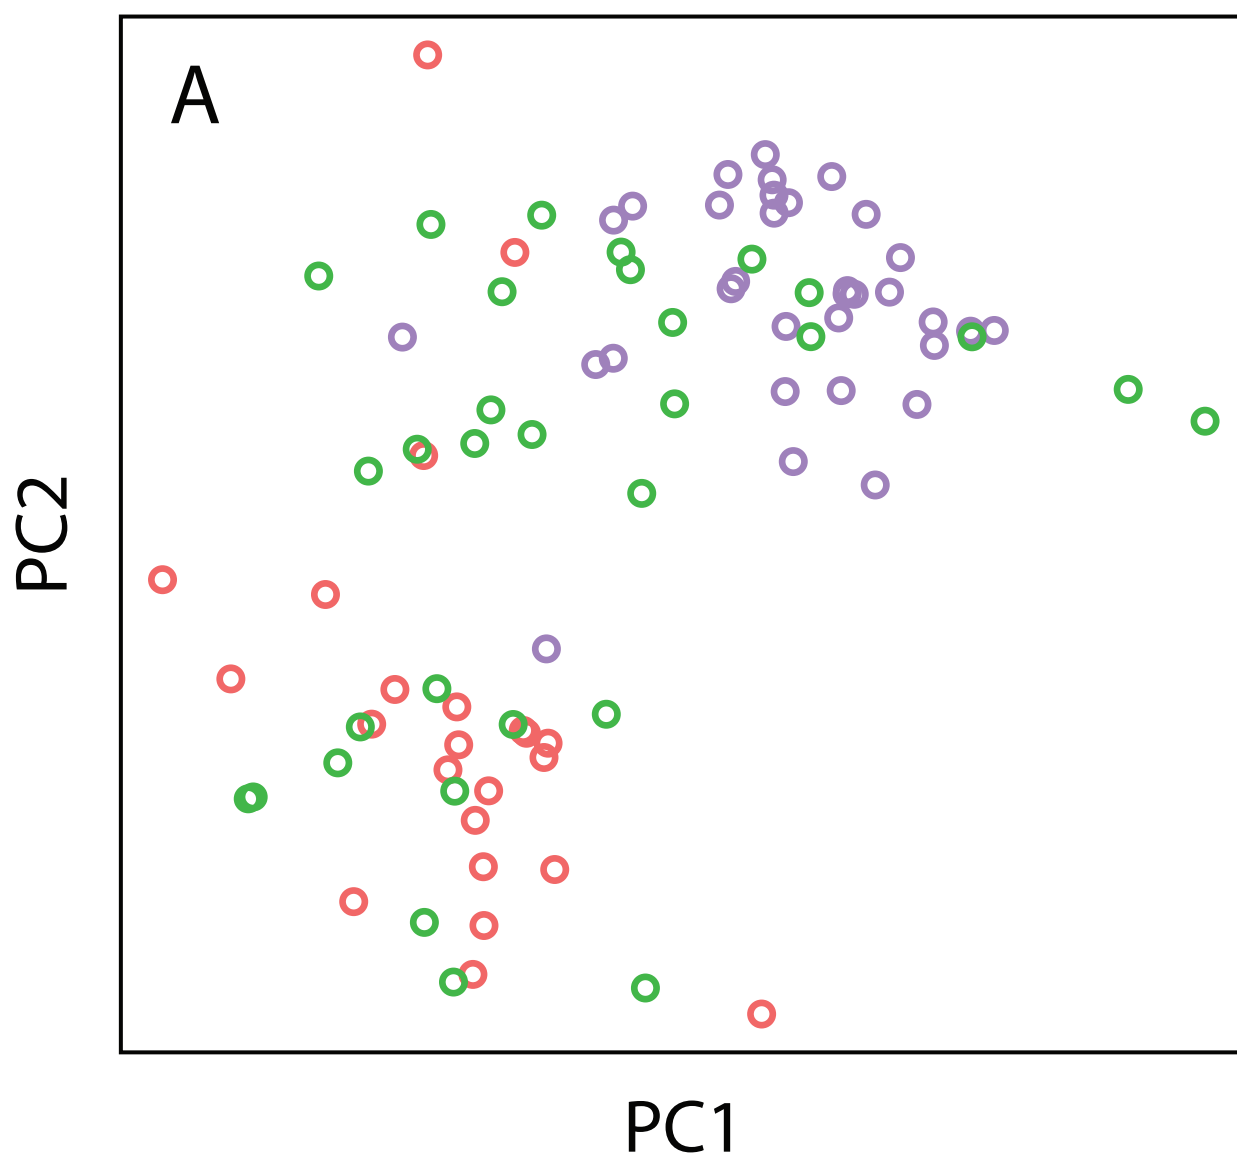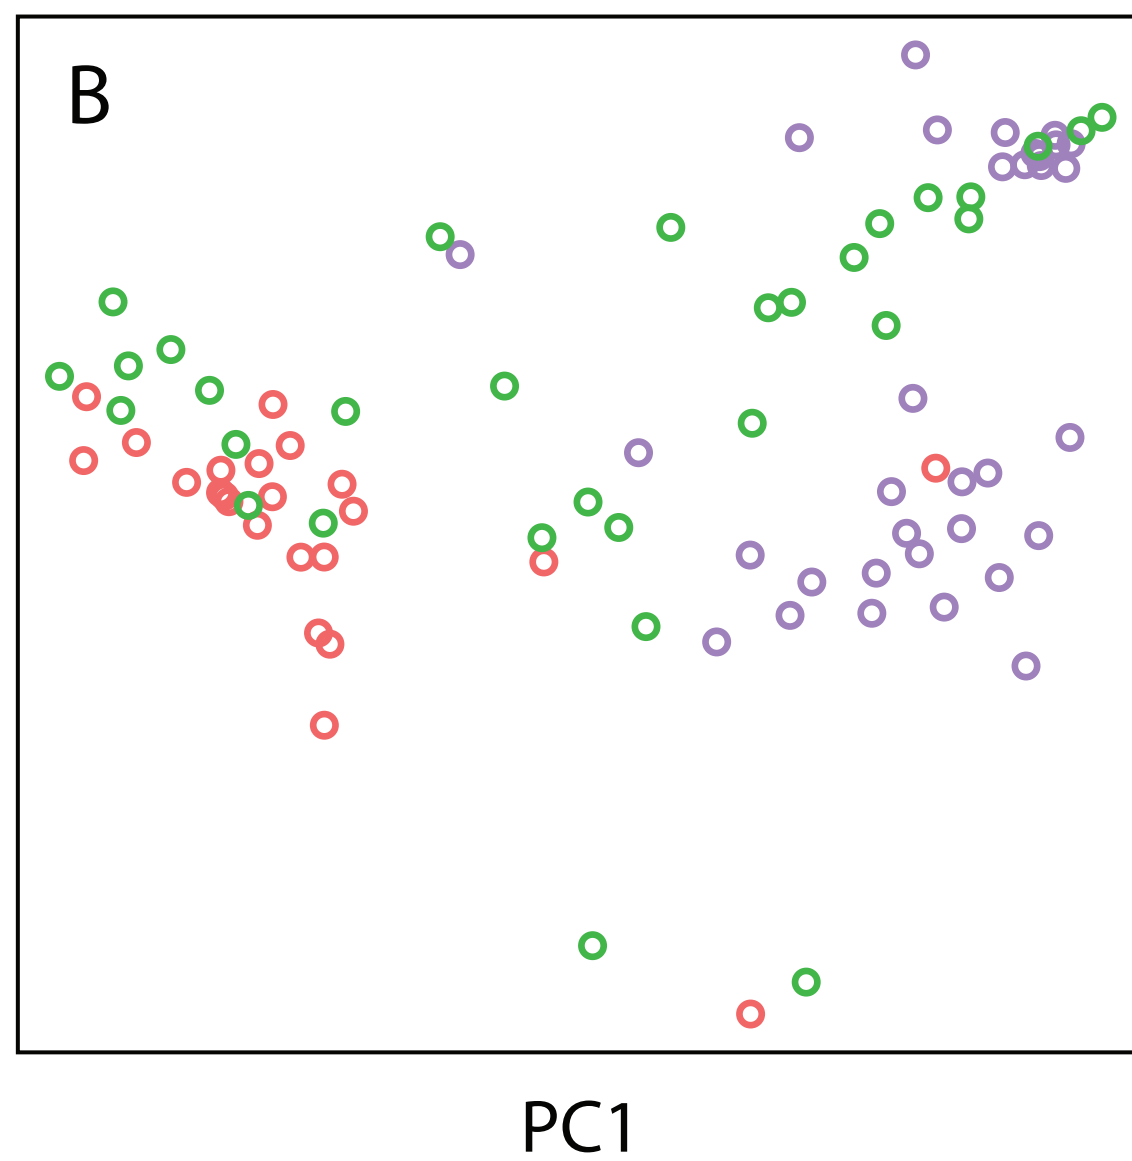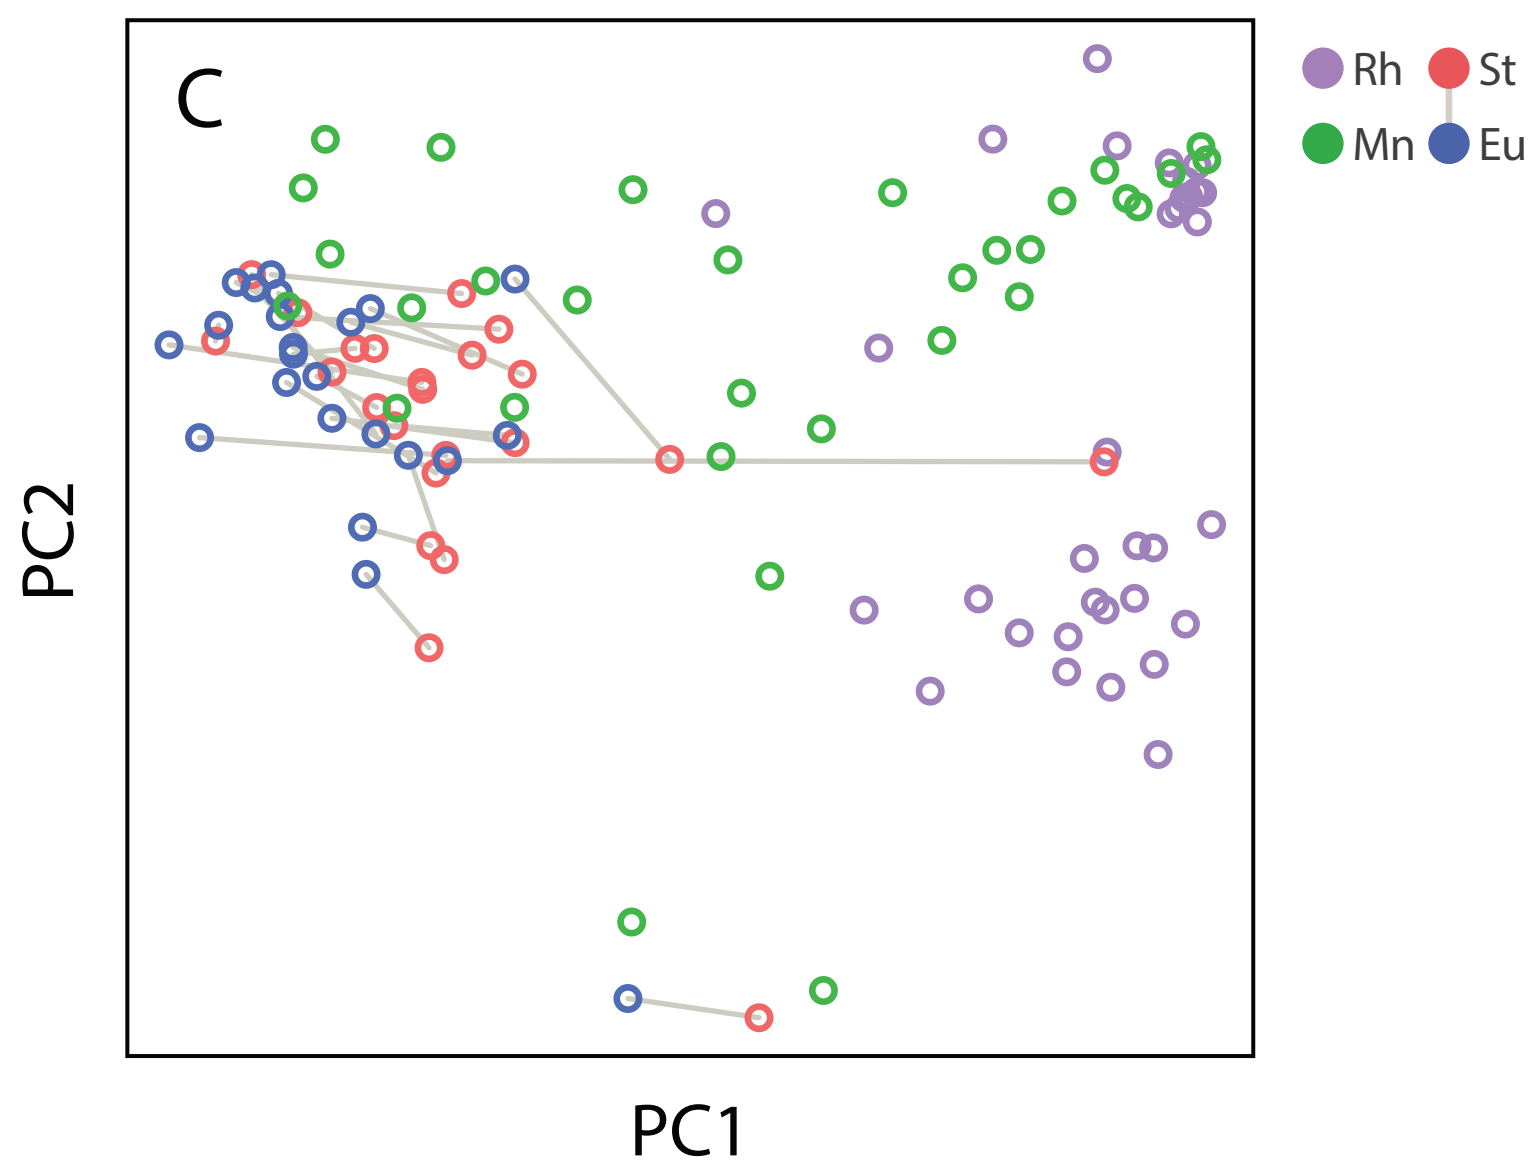

Supplement: supp [file elife_poa_e05463_Figure_3_figure_supplement_1.pdf › elife_poa_e05463_Figure_3_figure_supplement_1.pdf]

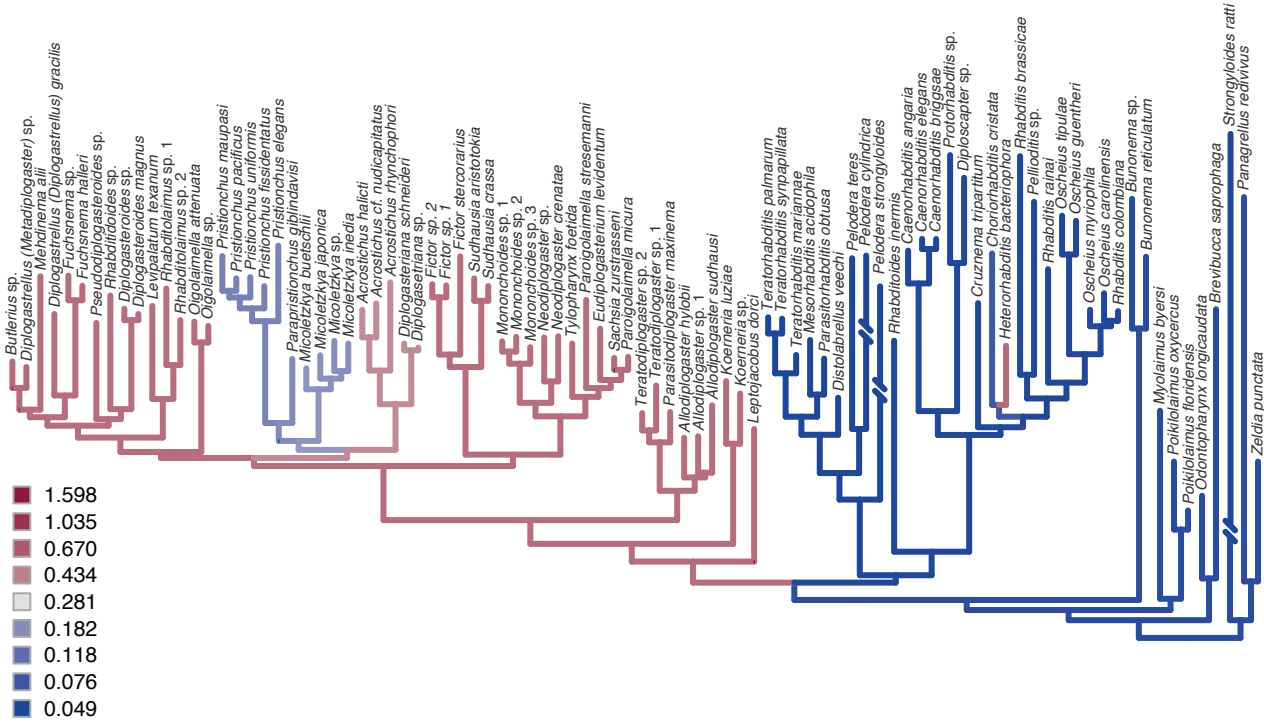

Supplement: supp [file elife_poa_e05463_Figure_3_figure_supplement_2.pdf › elife_poa_e05463_Figure_3_figure_supplement_2.pdf]

A

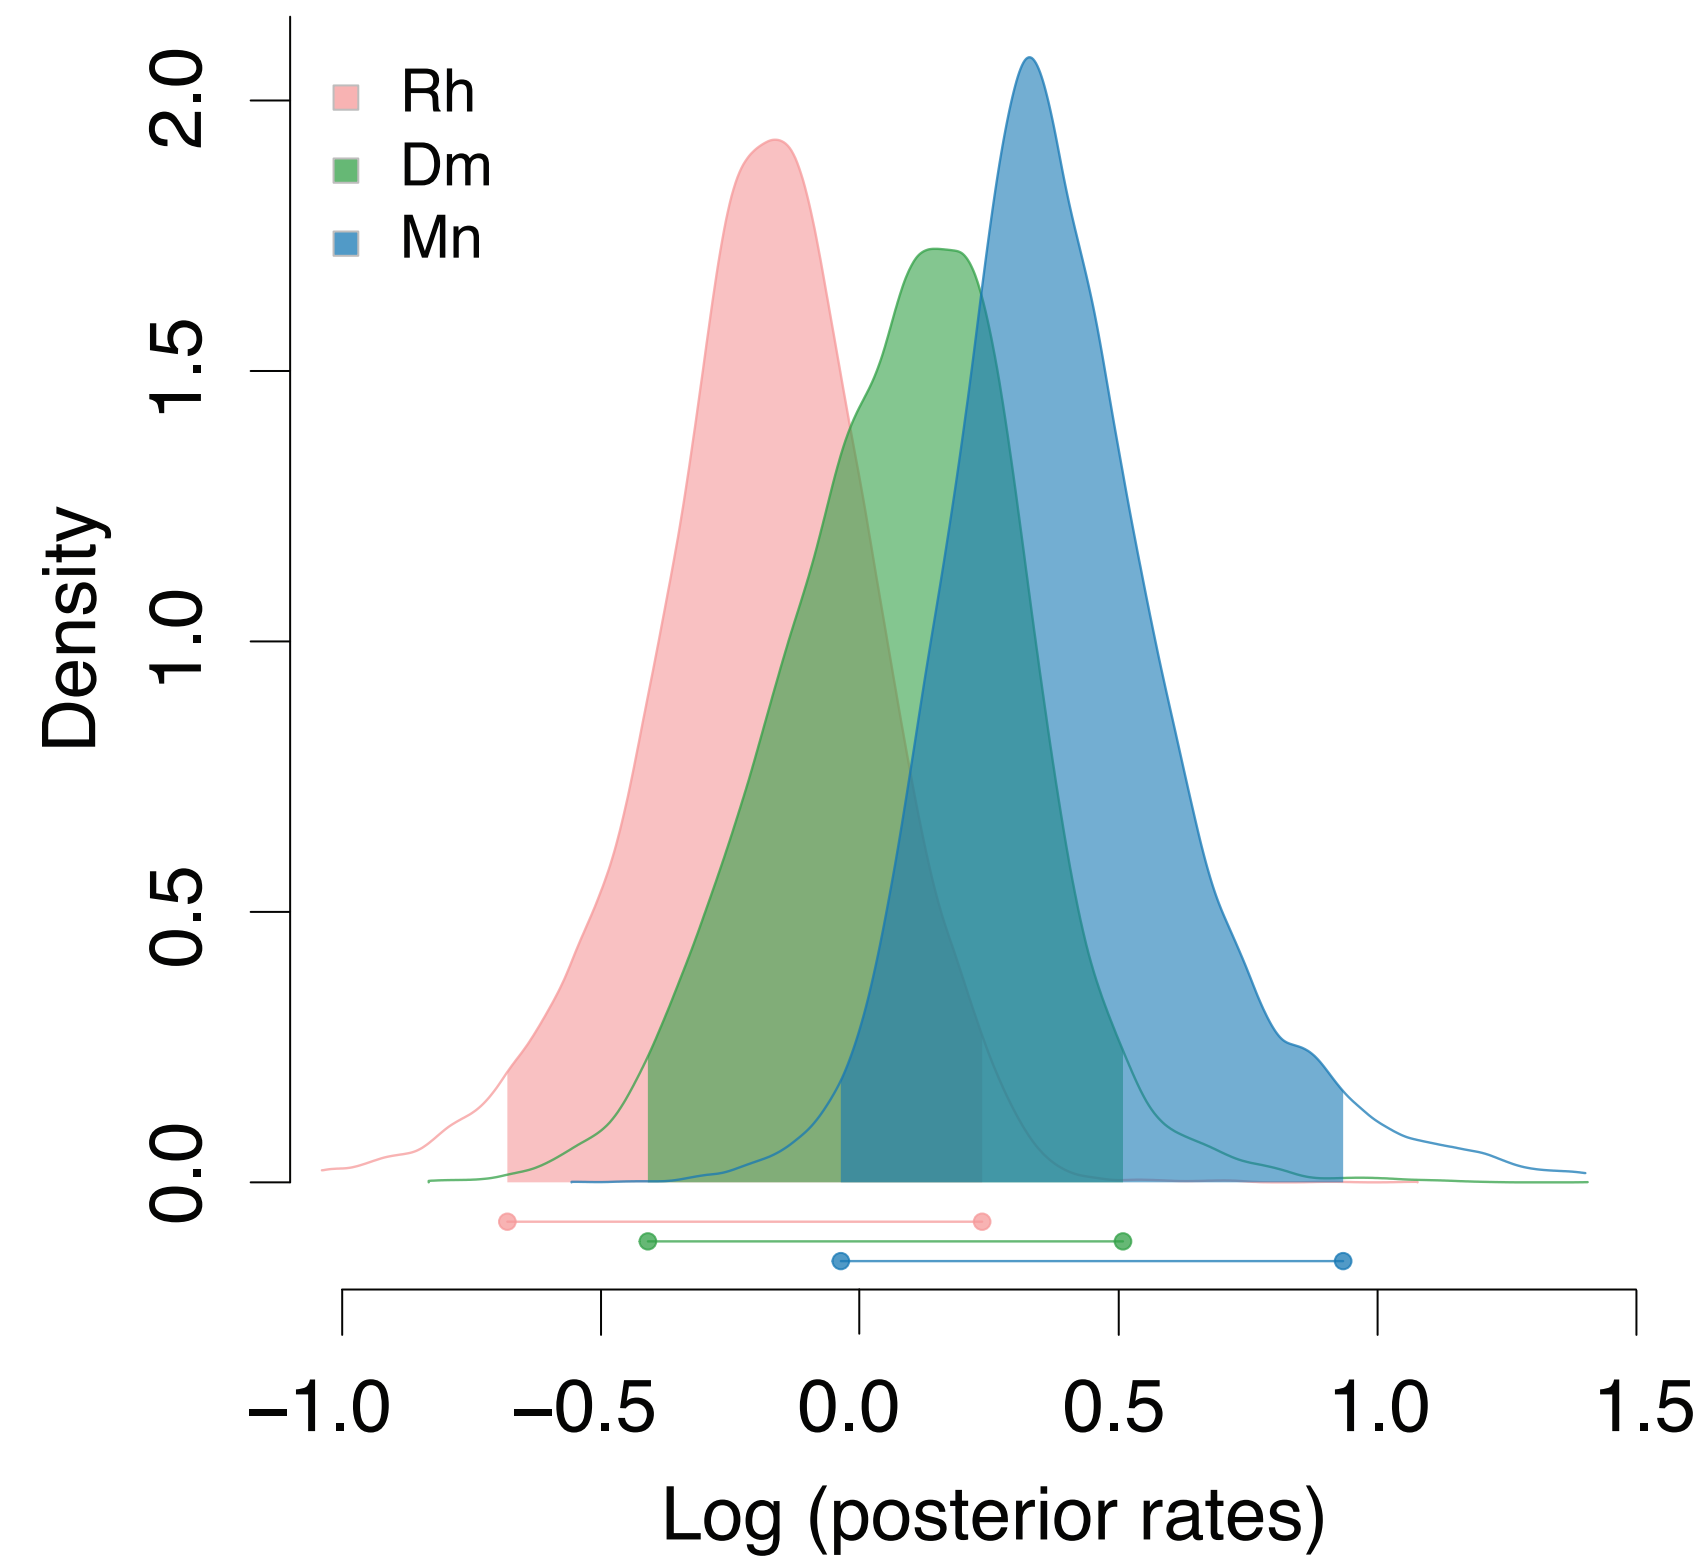

B

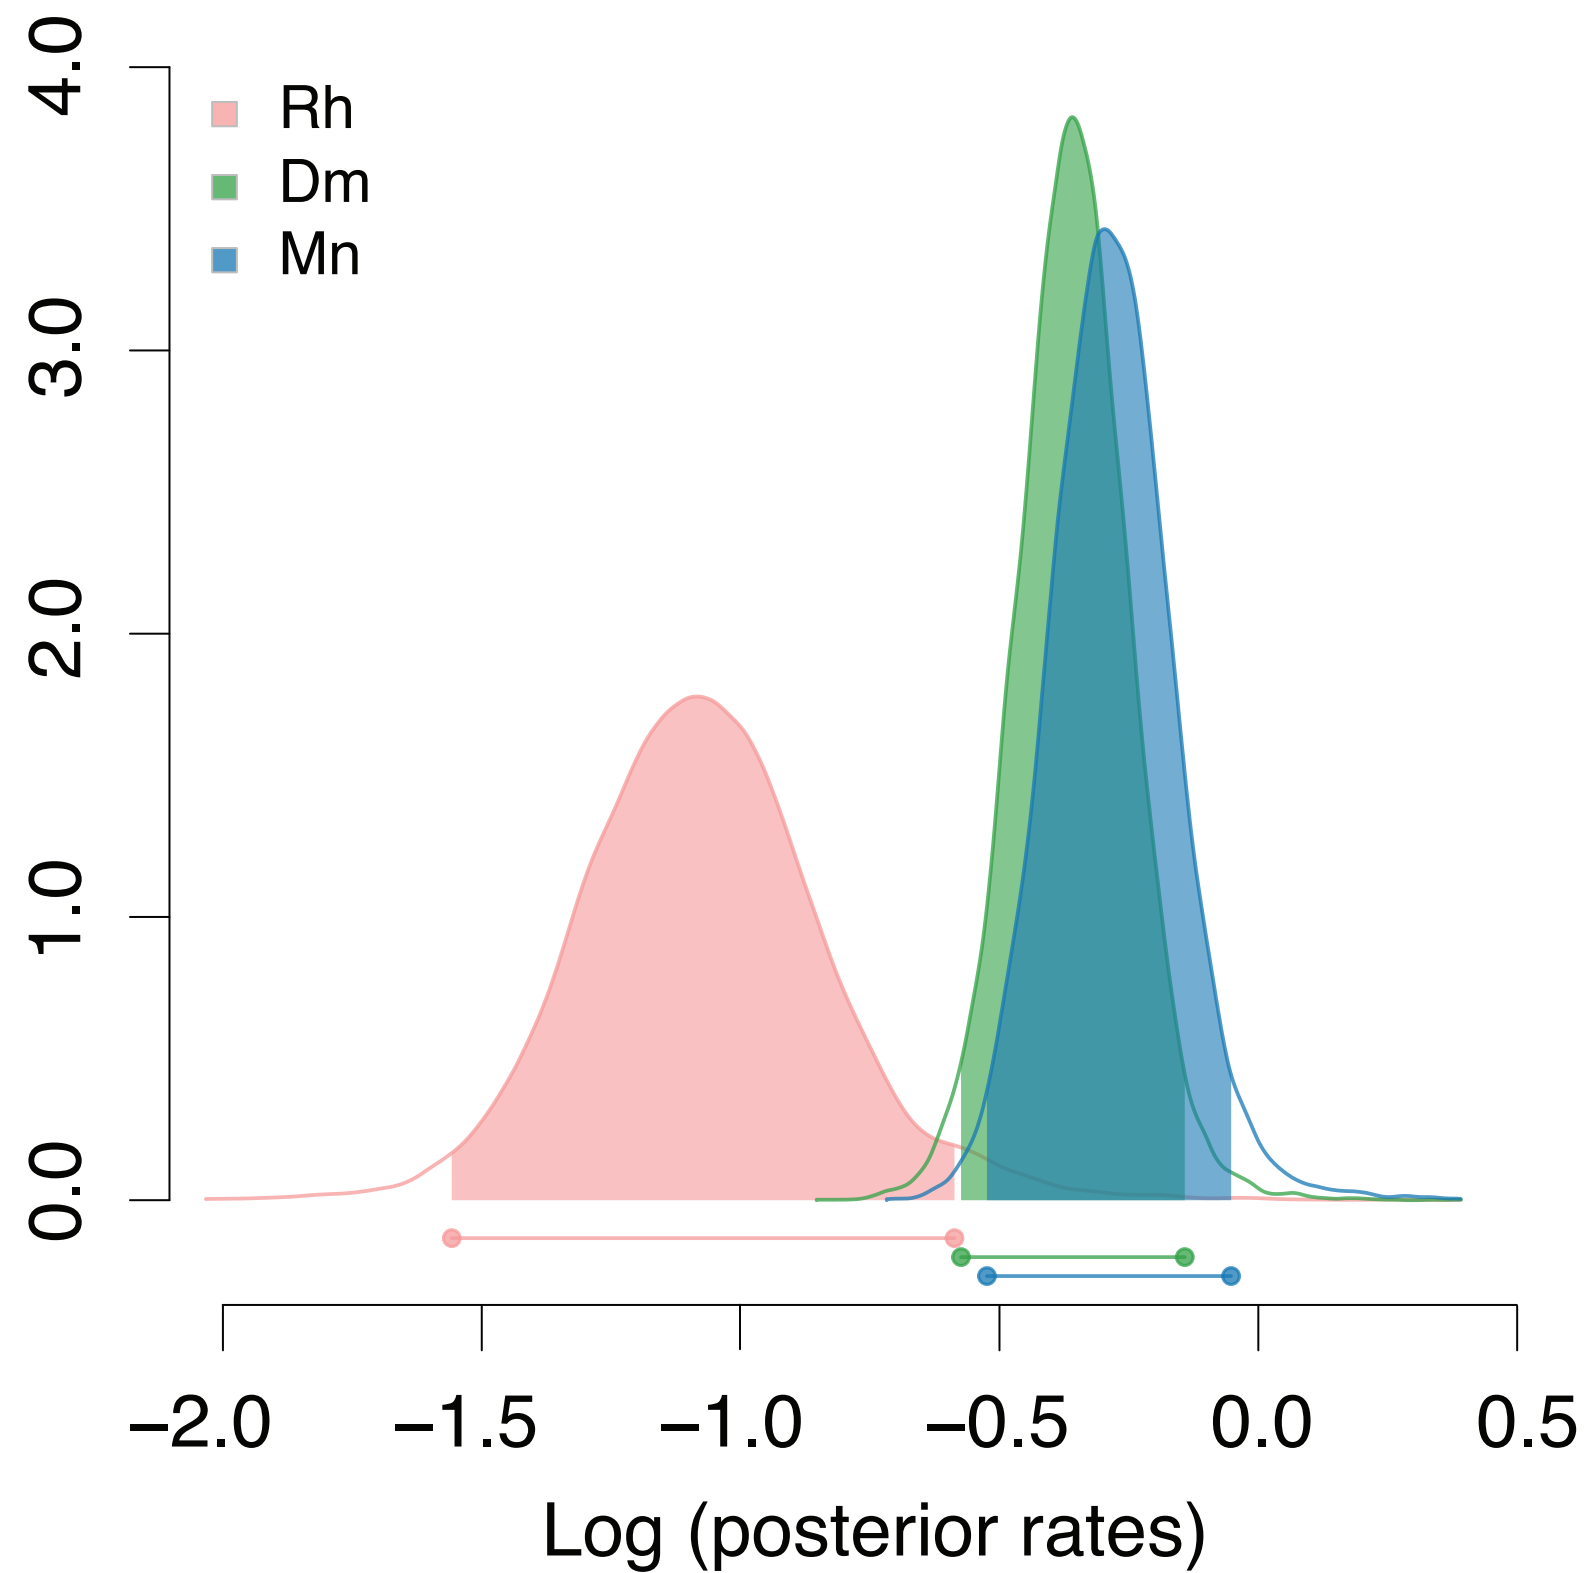

Supplement: supp [file elife_poa_e05463_Figure_3_figure_supplement_3.pdf › elife_poa_e05463_Figure_3_figure_supplement_3.pdf]

A

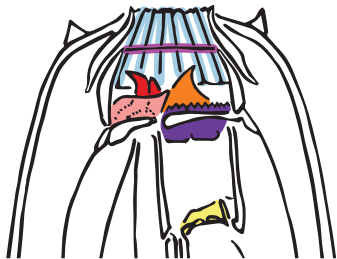

B

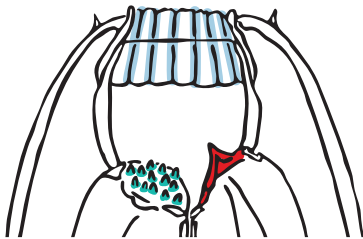

C

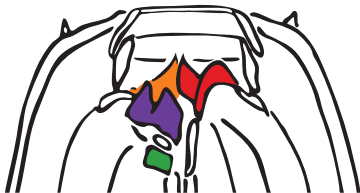

D

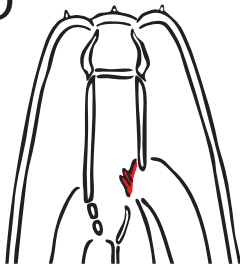

Supplement: supp [file elife_poa_e05463_Figure_4_figure_supplement_1.pdf › elife_poa_e05463_Figure_4_figure_supplement_1.pdf]
